# Supplementary material for: Next-Generation Sequencing Identifies Deregulation of MicroRNAs Involved in Both Innate and Adaptive Immune Response in ALK+ ALCL
Source: PubMed Central journal article supplement (PMC4331429; doi:10.1371/journal.pone.0117780), 2015-02-17
Supplement: pone.0117780.s002.pdf [file pone.0117780.s002.pdf]

1 **S1 Table: Significantly regulated miRNAs between ALK+ ALCLs, ALK- ALCLs**  
2 **and normal T cells.** The 82 significantly regulated miRNAs between ALK+ ALCL cell  
3 lines and the ALK- cell line and between ALK+ ALCL cell lines and normal T cells are  
4 shown and expression (base mean) and significance (padj) values of the significantly  
5 regulated miRNAs are indicated. The 56 miRNAs additionally significantly regulated  
6 between ALK- ALCL cells and T cells are highlighted in grey.

| miRNA           | ALK- ALCL<br>base mean | ALK+ ALCL<br>base mean | padj     | T cells<br>base mean | ALK+ ALCL<br>base mean | padj     |
|-----------------|------------------------|------------------------|----------|----------------------|------------------------|----------|
| hsa-miR-196b    | 186                    | 0                      | 2,48E-43 | 7                    | 0                      | 1,37E-08 |
| hsa-miR-155     | 44475                  | 1205                   | 8,56E-35 | 3622                 | 1205                   | 1,09E-04 |
| hsa-miR-146a    | 2525                   | 29                     | 3,34E-27 | 7082                 | 29                     | 3,03E-37 |
| hsa-miR-203     | 0                      | 316                    | 1,19E-23 | 8                    | 316                    | 2,57E-14 |
| hsa-miR-135b    | 2                      | 405                    | 1,07E-21 | 6                    | 405                    | 4,46E-17 |
| hsa-miR-135b*   | 0                      | 119                    | 1,67E-18 | 0                    | 119                    | 1,60E-17 |
| hsa-miR-503     | 343                    | 22                     | 1,14E-16 | 2                    | 22                     | 7,13E-06 |
| hsa-miR-424*    | 910                    | 78                     | 7,64E-15 | 28                   | 78                     | 7,90E-03 |
| hsa-miR-182     | 672                    | 17849                  | 3,79E-14 | 86                   | 17849                  | 3,24E-27 |
| hsa-miR-183     | 51                     | 1473                   | 3,79E-14 | 4                    | 1473                   | 1,11E-27 |
| hsa-miR-542-3p  | 413                    | 38                     | 1,40E-13 | 8                    | 38                     | 7,49E-04 |
| hsa-miR-513a-5p | 26                     | 0                      | 3,33E-13 | 1                    | 0                      | 4,78E-02 |
| hsa-miR-450b-5p | 1246                   | 134                    | 7,43E-13 | 19                   | 134                    | 2,00E-06 |
| hsa-miR-3194    | 28                     | 0                      | 9,89E-13 | 14                   | 0                      | 2,60E-08 |
| hsa-miR-149     | 427                    | 51                     | 1,67E-12 | 3                    | 51                     | 4,80E-08 |
| hsa-miR-193b    | 1910                   | 240                    | 6,83E-12 | 73                   | 240                    | 2,34E-03 |
| hsa-miR-199a-5p | 28                     | 0                      | 2,28E-11 | 6                    | 0                      | 9,40E-04 |
| hsa-miR-513c    | 19                     | 0                      | 2,81E-11 | 6                    | 0                      | 1,20E-06 |
| hsa-miR-4326    | 0                      | 30                     | 3,58E-11 | 9                    | 30                     | 9,93E-03 |
| hsa-miR-574-3p  | 0                      | 31                     | 3,58E-11 | 5                    | 31                     | 3,31E-04 |
| hsa-miR-96      | 2                      | 71                     | 5,09E-11 | 0                    | 71                     | 1,60E-14 |
| hsa-miR-365     | 400                    | 55                     | 1,84E-10 | 17                   | 55                     | 8,50E-03 |
| hsa-miR-450a    | 438                    | 50                     | 2,94E-10 | 19                   | 50                     | 1,99E-02 |
| hsa-miR-3200-3p | 115                    | 15                     | 1,39E-08 | 1                    | 15                     | 2,77E-05 |
| hsa-miR-183*    | 1                      | 34                     | 1,61E-08 | 0                    | 34                     | 3,85E-10 |
| hsa-miR-9       | 20                     | 940                    | 5,99E-08 | 24                   | 940                    | 7,48E-08 |
| hsa-miR-181a-2* | 0                      | 38                     | 7,16E-08 | 615                  | 38                     | 2,66E-08 |
| hsa-miR-33b     | 304                    | 61                     | 2,74E-07 | 179                  | 61                     | 5,64E-04 |
| hsa-miR-497     | 25                     | 2                      | 2,74E-07 | 9                    | 2                      | 2,26E-03 |
| hsa-miR-548i    | 0                      | 16                     | 3,78E-06 | 3                    | 16                     | 2,64E-02 |
| hsa-miR-195     | 19                     | 1                      | 1,21E-05 | 8                    | 1                      | 6,18E-03 |
| hsa-miR-9*      | 1                      | 11                     | 1,89E-04 | 2                    | 11                     | 5,00E-03 |
| hsa-miR-26a     | 17721                  | 5467                   | 1,92E-04 | 200819               | 5467                   | 9,38E-34 |
| hsa-miR-582-5p  | 0                      | 6                      | 3,20E-04 | 17                   | 6                      | 2,53E-02 |
| hsa-miR-20b*    | 1                      | 22                     | 3,55E-04 | 0                    | 22                     | 3,23E-05 |
| hsa-miR-1246    | 57                     | 252                    | 3,62E-04 | 7                    | 252                    | 4,22E-14 |
| hsa-miR-205     | 6                      | 0                      | 3,85E-04 | 2                    | 0                      | 1,80E-02 |
| hsa-miR-223     | 0                      | 7                      | 8,15E-04 | 523                  | 7                      | 1,23E-18 |
| hsa-miR-574-5p  | 9                      | 55                     | 1,12E-03 | 4                    | 55                     | 9,87E-06 |
| hsa-miR-145     | 0                      | 59                     | 1,20E-03 | 0                    | 59                     | 2,34E-03 |
| hsa-miR-34a     | 1248                   | 443                    | 2,12E-03 | 42                   | 443                    | 1,05E-08 |
| hsa-miR-335*    | 0                      | 7                      | 2,45E-03 | 189                  | 7                      | 4,83E-08 |
| hsa-miR-196a    | 1772                   | 602                    | 2,47E-03 | 7                    | 602                    | 2,16E-19 |
| hsa-miR-549     | 0                      | 49                     | 2,47E-03 | 0                    | 49                     | 1,72E-03 |
| hsa-miR-301b    | 651                    | 246                    | 2,82E-03 | 15                   | 246                    | 3,88E-10 |

|                 |       |       |          |        |       |          |
|-----------------|-------|-------|----------|--------|-------|----------|
| hsa-miR-342-3p  | 825   | 300   | 2,82E-03 | 15014  | 300   | 3,45E-38 |
| hsa-miR-766     | 80    | 29    | 3,37E-03 | 141    | 29    | 5,95E-07 |
| hsa-miR-625*    | 107   | 35    | 3,42E-03 | 108    | 35    | 1,44E-03 |
| hsa-miR-1271    | 6     | 1     | 3,43E-03 | 7      | 1     | 1,04E-03 |
| hsa-miR-3938    | 0     | 13    | 3,49E-03 | 0      | 13    | 1,29E-03 |
| hsa-miR-339-3p  | 218   | 720   | 3,72E-03 | 2601   | 720   | 3,90E-05 |
| hsa-miR-2355-5p | 10    | 2     | 4,27E-03 | 17     | 2     | 6,01E-05 |
| hsa-miR-181a    | 60934 | 23243 | 7,10E-03 | 119105 | 23243 | 6,47E-08 |
| hsa-miR-874     | 8     | 29    | 7,81E-03 | 183    | 29    | 2,22E-08 |
| hsa-miR-1301    | 30    | 10    | 1,00E-02 | 35     | 10    | 1,44E-03 |
| hsa-miR-625     | 77    | 28    | 1,04E-02 | 63     | 28    | 2,90E-02 |
| hsa-miR-21*     | 11990 | 33125 | 1,11E-02 | 3020   | 33125 | 1,86E-09 |
| hsa-miR-342-5p  | 54    | 21    | 1,11E-02 | 720    | 21    | 1,57E-29 |
| hsa-miR-25*     | 41    | 124   | 1,28E-02 | 35     | 124   | 1,44E-03 |
| hsa-miR-2110    | 10    | 3     | 1,32E-02 | 16     | 3     | 3,52E-04 |
| hsa-miR-221     | 4000  | 1627  | 1,52E-02 | 3470   | 1627  | 2,35E-02 |
| hsa-miR-363     | 729   | 6511  | 1,56E-02 | 1230   | 6511  | 3,33E-02 |
| hsa-miR-92a-2*  | 0     | 7     | 1,56E-02 | 0      | 7     | 6,24E-03 |
| hsa-miR-548n    | 12    | 55    | 1,70E-02 | 5      | 55    | 2,00E-04 |
| hsa-miR-548t    | 0     | 3     | 1,80E-02 | 0      | 3     | 2,66E-02 |
| hsa-miR-194     | 108   | 44    | 1,94E-02 | 465    | 44    | 4,22E-14 |
| hsa-miR-3182    | 194   | 4892  | 1,94E-02 | 5      | 4892  | 6,23E-06 |
| hsa-miR-98      | 14172 | 6215  | 2,43E-02 | 1375   | 6215  | 5,31E-05 |
| hsa-miR-106a    | 101   | 668   | 2,79E-02 | 31     | 668   | 1,88E-04 |
| hsa-miR-192     | 3599  | 1669  | 2,81E-02 | 15403  | 1669  | 3,00E-14 |
| hsa-miR-629*    | 7     | 23    | 2,83E-02 | 5      | 23    | 2,19E-03 |
| hsa-miR-139-5p  | 1     | 6     | 3,19E-02 | 1      | 6     | 3,27E-02 |
| hsa-miR-20b     | 230   | 1614  | 3,19E-02 | 57     | 1614  | 1,20E-04 |
| hsa-miR-942     | 31    | 11    | 3,46E-02 | 32     | 11    | 1,11E-02 |
| hsa-miR-501-3p  | 62    | 207   | 3,48E-02 | 18     | 207   | 3,81E-06 |
| hsa-miR-210     | 1220  | 390   | 3,57E-02 | 58     | 390   | 4,70E-04 |
| hsa-miR-1910    | 0     | 8     | 3,63E-02 | 0      | 8     | 7,91E-03 |
| hsa-miR-320d    | 1     | 5     | 3,88E-02 | 25     | 5     | 3,37E-03 |
| hsa-miR-505     | 83    | 37    | 3,99E-02 | 84     | 37    | 2,19E-02 |
| hsa-miR-145*    | 0     | 9     | 4,03E-02 | 0      | 9     | 3,28E-02 |
| hsa-miR-33b*    | 35    | 14    | 4,37E-02 | 4      | 14    | 2,72E-02 |
| hsa-miR-937     | 22    | 8     | 4,68E-02 | 1      | 8     | 4,62E-03 |

7
