# Supplementary material for: Next-Generation Sequencing Identifies Deregulation of MicroRNAs Involved in Both Innate and Adaptive Immune Response in ALK+ ALCL
Source: PubMed Central journal article supplement (PMC4331429; doi:10.1371/journal.pone.0117780), 2015-02-17
Supplement: pone.0117780.s003.pdf [file pone.0117780.s003.pdf]

1 **S2 Table: RT-qPCR validation of miRNA NGS results.** The expression level  
2 tendencies of twelve miRNAs were validated in the three ALK+ ALCL cell lines  
3 SUDHL-1, KiJK and Karpas 299 and the ALK- ALCL cell line Mac-1 and T cells using  
4 RT-qPCR. RT-qPCR values were normalized to miR-106b and data were analyzed  
5 according to the  $2^{-\Delta\Delta C_p}$  method. NGS results are represented as base mean  
6 expression and RT-qPCR results are shown as percentages relative to SUDHL-1  
7 cells (100%).

| miRNA<br>method | <u>hsa-miR-182</u> |         | <u>hsa-miR-183</u> |         | <u>hsa-miR-203</u> |         | <u>hsa-miR-7</u> |         |
|-----------------|--------------------|---------|--------------------|---------|--------------------|---------|------------------|---------|
|                 | NGS                | RT-qPCR | NGS                | RT-qPCR | NGS                | RT-qPCR | NGS              | RT-qPCR |
| SUDHL-1         | 12432              | 100     | 1412               | 100     | 395                | 100     | 255              | 100     |
| KiJK            | 21425              | 220     | 1562               | 183     | 352                | 88      | 108              | 50      |
| Karpas 299      | 19689              | 244     | 1446               | 172     | 201                | 51      | 187              | 67      |
| Mac-1           | 672                | 7       | 51                 | 7       | 0                  | 1       | 132              | 35      |
| T cells         | 86                 | 4       | 4                  | 0       | 8                  | 5       | 48               | 31      |

| miRNA<br>method | <u>hsa-miR-146a</u> |         | <u>hsa-miR-146b-5p</u> |         | <u>hsa-miR-181a</u> |         | <u>hsa-miR-181a*</u> |         |
|-----------------|---------------------|---------|------------------------|---------|---------------------|---------|----------------------|---------|
|                 | NGS                 | RT-qPCR | NGS                    | RT-qPCR | NGS                 | RT-qPCR | NGS                  | RT-qPCR |
| SUDHL-1         | 37                  | 100     | 202140                 | 100     | 5082                | 100     | 481                  | 100     |
| KiJK            | 11                  | 31      | 61268                  | 28      | 47126               | 949     | 3881                 | 1213    |
| Karpas 299      | 39                  | 187     | 1042                   | 0       | 17521               | 683     | 1182                 | 536     |
| Mac-1           | 2525                | 4077    | 3566                   | 2       | 60934               | 1198    | 1539                 | 776     |
| T cells         | 7082                | 12014   | 38699                  | 19      | 119105              | 1213    | 1208                 | 425     |

| miRNA<br>method | <u>hsa-miR-181c</u> |         | <u>hsa-miR-29c</u> |         | <u>hsa-miR-342-3p</u> |         | <u>hsa-miR-486-5p</u> |         |
|-----------------|---------------------|---------|--------------------|---------|-----------------------|---------|-----------------------|---------|
|                 | NGS                 | RT-qPCR | NGS                | RT-qPCR | NGS                   | RT-qPCR | NGS                   | RT-qPCR |
| SUDHL-1         | 5                   | 100     | 283                | 100     | 448                   | 100     | 16                    | 100     |
| KiJK            | 62                  | 1008    | 1155               | 177     | 198                   | 56      | 5                     | 116     |
| Karpas 299      | 299                 | 713     | 756                | 208     | 252                   | 93      | 2106                  | 151     |
| Mac-1           | 283                 | 1193    | 480                | 312     | 825                   | 229     | 788                   | 200     |
| T cells         | 3493                | 1188    | 12645              | 3002    | 15014                 | 4142    | 2915                  | 221     |

8

9

10
