# Supplementary material for: Next-Generation Sequencing Identifies Deregulation of MicroRNAs Involved in Both Innate and Adaptive Immune Response in ALK+ ALCL
Source: PubMed Central journal article supplement (PMC4331429; doi:10.1371/journal.pone.0117780), 2015-02-17
Supplement: pone.0117780.s004.pdf [file pone.0117780.s004.pdf]

1 **S3 Table: Significantly regulated miRNAs after C/EBP $\beta$  knockdown.** The 80  
2 significantly regulated miRNAs in at least one of the analyzed ALK+ ALCL cell lines  
3 by C/EBP $\beta$  are shown and miRNA expression levels (base mean of triplicates) of the  
4 three ALK+ ALCL cell lines SUDHL-1, KiJK and Karpas 299 with (pF-C/EBP $\beta$ ) and  
5 without (pF) C/EBP $\beta$  knockdown as well as the ALK- ALCL cell line Mac-1 and  
6 normal T cells are depicted.

| ID              | SUDHL           | SUDHL-1                       | KiJK            | KiJK                          | Karpas 299      | Karpas 299                    | Mac-1     | T cells   |
|-----------------|-----------------|-------------------------------|-----------------|-------------------------------|-----------------|-------------------------------|-----------|-----------|
|                 | nF<br>base mean | nF-C/EBP $\beta$<br>base mean | nF<br>base mean | nF-C/EBP $\beta$<br>base mean | nF<br>base mean | nF-C/EBP $\beta$<br>base mean | base mean | base mean |
| hsa-let-7d      | 543             | 356                           | 2354            | 1867                          | 1726            | 1456                          | 4207      | 1914      |
| hsa-let-7g      | 6659            | 4697                          | 8158            | 7374                          | 11530           | 13592                         | 11558     | 92352     |
| hsa-let-7i      | 3202            | 1953                          | 5851            | 5203                          | 4637            | 4817                          | 6044      | 16751     |
| hsa-miR-101*    | 9               | 21                            | 15              | 15                            | 14              | 17                            | 5         | 61        |
| hsa-miR-103     | 9943            | 9206                          | 5233            | 4054                          | 5611            | 5359                          | 8770      | 5393      |
| hsa-miR-106a    | 1228            | 799                           | 1               | 1                             | 776             | 671                           | 101       | 31        |
| hsa-miR-106b*   | 391             | 276                           | 393             | 337                           | 363             | 352                           | 432       | 342       |
| hsa-miR-10a     | 496             | 747                           | 38              | 53                            | 904             | 1029                          | 267       | 4737      |
| hsa-miR-1246    | 133             | 465                           | 388             | 737                           | 235             | 296                           | 57        | 7         |
| hsa-miR-1248    | 3               | 10                            | 14              | 13                            | 6               | 14                            | 2         | 5         |
| hsa-miR-1261    | 35              | 19                            | 20              | 23                            | 22              | 23                            | 9         | 9         |
| hsa-miR-1274b   | 8944            | 2889                          | 7522            | 5730                          | 7445            | 8482                          | 3300      | 3565      |
| hsa-miR-128     | 773             | 1091                          | 926             | 1015                          | 938             | 689                           | 621       | 901       |
| hsa-miR-1291    | 412             | 132                           | 118             | 118                           | 220             | 95                            | 132       | 114       |
| hsa-miR-1293    | 3               | 3                             | 1               | 6                             | 0               | 0                             | 0         | 0         |
| hsa-miR-135b*   | 155             | 113                           | 124             | 115                           | 79              | 72                            | 0         | 0         |
| hsa-miR-142-3p  | 5689            | 7820                          | 5473            | 6745                          | 4745            | 4616                          | 9212      | 27953     |
| hsa-miR-143     | 630             | 242                           | 7               | 3                             | 62              | 31                            | 19        | 152       |
| hsa-miR-1468    | 11              | 4                             | 41              | 34                            | 6               | 6                             | 20        | 62        |
| hsa-miR-146a    | 37              | 17                            | 11              | 8                             | 39              | 61                            | 2525      | 7082      |
| hsa-miR-146b-3p | 6213            | 2382                          | 1866            | 1354                          | 45              | 29                            | 88        | 2048      |
| hsa-miR-146b-5p | 202140          | 76407                         | 61268           | 42117                         | 1042            | 720                           | 3566      | 38699     |
| hsa-miR-148a*   | 676             | 586                           | 2591            | 1823                          | 90              | 64                            | 197       | 113       |
| hsa-miR-155     | 3608            | 2128                          | 2               | 1                             | 4               | 7                             | 44475     | 3622      |
| hsa-miR-181a    | 5082            | 7140                          | 47126           | 62767                         | 17521           | 26417                         | 60934     | 119105    |
| hsa-miR-181a*   | 481             | 1088                          | 3881            | 5949                          | 1182            | 1962                          | 1539      | 1208      |
| hsa-miR-181b    | 1043            | 1868                          | 9727            | 12252                         | 3201            | 5067                          | 7133      | 4238      |
| hsa-miR-181c    | 5               | 12                            | 62              | 115                           | 299             | 283                           | 283       | 3493      |
| hsa-miR-18b     | 225             | 151                           | 1               | 1                             | 116             | 69                            | 20        | 4         |
| hsa-miR-193a-5p | 83              | 40                            | 31              | 16                            | 45              | 50                            | 36        | 13        |
| hsa-miR-193b    | 336             | 189                           | 0               | 0                             | 382             | 169                           | 1910      | 73        |
| hsa-miR-203     | 395             | 213                           | 352             | 159                           | 201             | 100                           | 0         | 8         |
| hsa-miR-204     | 5               | 12                            | 1               | 0                             | 1               | 0                             | 0         | 0         |
| hsa-miR-20b     | 3152            | 2057                          | 1               | 1                             | 1690            | 1632                          | 230       | 57        |
| hsa-miR-22      | 35466           | 34625                         | 4454            | 6404                          | 3747            | 3772                          | 8935      | 25356     |
| hsa-miR-221*    | 27              | 40                            | 24              | 19                            | 47              | 80                            | 54        | 10        |
| hsa-miR-222     | 1979            | 1831                          | 1740            | 1133                          | 2285            | 3237                          | 3298      | 1040      |
| hsa-miR-222*    | 7               | 22                            | 16              | 11                            | 13              | 11                            | 49        | 5         |
| hsa-miR-223     | 19              | 4                             | 3               | 1                             | 0               | 1                             | 0         | 523       |
| hsa-miR-223*    | 11              | 1                             | 3               | 0                             | 0               | 0                             | 0         | 16        |
| hsa-miR-26a     | 8577            | 8070                          | 2034            | 2883                          | 5792            | 5703                          | 17721     | 200819    |
| hsa-miR-26b     | 5991            | 3766                          | 3034            | 2696                          | 3939            | 3325                          | 6891      | 31932     |
| hsa-miR-27a     | 2293            | 2378                          | 2959            | 4561                          | 5959            | 5365                          | 6889      | 10857     |
| hsa-miR-29a     | 1663            | 1982                          | 2049            | 2577                          | 4607            | 4530                          | 4248      | 36185     |

|                 |       |      |       |       |      |      |       |       |
|-----------------|-------|------|-------|-------|------|------|-------|-------|
| hsa-miR-29b-1*  | 24    | 14   | 32    | 15    | 50   | 50   | 25    | 23    |
| hsa-miR-29c     | 283   | 386  | 1155  | 1766  | 756  | 699  | 480   | 12645 |
| hsa-miR-3168    | 54    | 101  | 70    | 69    | 65   | 120  | 67    | 44    |
| hsa-miR-3182    | 2278  | 2507 | 11888 | 21342 | 511  | 1975 | 194   | 5     |
| hsa-miR-3195    | 25    | 15   | 29    | 93    | 9    | 12   | 45    | 24    |
| hsa-miR-33a*    | 15    | 19   | 13    | 28    | 32   | 31   | 34    | 56    |
| hsa-miR-340     | 1398  | 1198 | 1570  | 1244  | 1647 | 1359 | 0     | 1093  |
| hsa-miR-345     | 1206  | 960  | 237   | 161   | 1015 | 658  | 663   | 162   |
| hsa-miR-3605-3p | 18    | 7    | 9     | 3     | 2    | 6    | 10    | 12    |
| hsa-miR-3605-5p | 5     | 2    | 1     | 4     | 1    | 2    | 2     | 0     |
| hsa-miR-3607-3p | 165   | 254  | 213   | 315   | 176  | 128  | 114   | 1721  |
| hsa-miR-3607-5p | 40    | 25   | 24    | 21    | 38   | 75   | 17    | 304   |
| hsa-miR-361-5p  | 187   | 257  | 143   | 204   | 210  | 200  | 114   | 575   |
| hsa-miR-363     | 12032 | 7537 | 5     | 5     | 7497 | 5759 | 729   | 1230  |
| hsa-miR-3647-3p | 12    | 28   | 33    | 39    | 56   | 57   | 32    | 307   |
| hsa-miR-365     | 88    | 42   | 5     | 5     | 72   | 33   | 400   | 17    |
| hsa-miR-3681    | 0     | 3    | 10    | 9     | 2    | 2    | 0     | 0     |
| hsa-miR-378*    | 33    | 53   | 16    | 20    | 22   | 28   | 21    | 14    |
| hsa-miR-4301    | 69    | 161  | 2034  | 5924  | 218  | 301  | 261   | 198   |
| hsa-miR-449a    | 20    | 40   | 1     | 1     | 1    | 1    | 3     | 0     |
| hsa-miR-449c    | 29    | 71   | 1     | 1     | 2    | 3    | 7     | 0     |
| hsa-miR-486-5p  | 16    | 40   | 5     | 8     | 2106 | 3028 | 788   | 2915  |
| hsa-miR-501-3p  | 358   | 432  | 189   | 101   | 73   | 72   | 62    | 18    |
| hsa-miR-502-3p  | 1042  | 986  | 549   | 414   | 385  | 416  | 294   | 122   |
| hsa-miR-548u    | 4     | 4    | 8     | 1     | 3    | 4    | 1     | 1     |
| hsa-miR-551b    | 7     | 10   | 95    | 134   | 110  | 84   | 63    | 0     |
| hsa-miR-615-3p  | 16    | 28   | 298   | 296   | 53   | 40   | 214   | 1     |
| hsa-miR-625     | 23    | 32   | 32    | 68    | 29   | 30   | 77    | 63    |
| hsa-miR-625*    | 26    | 22   | 28    | 51    | 51   | 62   | 107   | 108   |
| hsa-miR-7       | 255   | 164  | 108   | 72    | 187  | 187  | 132   | 48    |
| hsa-miR-708     | 1     | 1    | 804   | 1126  | 683  | 952  | 907   | 1     |
| hsa-miR-744     | 302   | 197  | 255   | 218   | 135  | 78   | 378   | 100   |
| hsa-miR-942     | 8     | 17   | 8     | 19    | 17   | 22   | 31    | 32    |
| hsa-miR-98      | 2167  | 1550 | 10260 | 7920  | 6218 | 5197 | 14172 | 1375  |
| hsa-miR-99a     | 92    | 131  | 0     | 0     | 0    | 0    | 6     | 186   |
| hsa-miR-99a*    | 10    | 17   | 0     | 0     | 0    | 0    | 0     | 13    |

7

8

9
