# Supplementary material for: Next-Generation Sequencing Identifies Deregulation of MicroRNAs Involved in Both Innate and Adaptive Immune Response in ALK+ ALCL
Source: PubMed Central journal article supplement (PMC4331429; doi:10.1371/journal.pone.0117780), 2015-02-17
Supplement: pone.0117780.s005.pdf [file pone.0117780.s005.pdf]

1 **S4 Table: Comparison of significantly ALK+ ALCL associated miRNAs between**  
2 **different studies [29, 31].** Comparison of our data with two previously published  
3 miRNA profiles of ALK+ ALCL by Merkel et al. [29] and Liu et al. [31]. Shown are the  
4 miRNAs, which were found in at least two different studies associated with ALK+  
5 ALCLs. In the studies different cell lines and/ or tumor specimens were used. X  
6 indicates, that miRNAs are differentially regulated by ALK and x\* symbolizes, that  
7 miRNAs are associated with ALK+ ALCL.

| miRNA           | Our data                                | Merkel et al.                                                        | Liu et al.                  |                   |
|-----------------|-----------------------------------------|----------------------------------------------------------------------|-----------------------------|-------------------|
|                 | SUDHL-1, KiJK,<br>Karpas 299 /<br>Mac-1 | Karpas 299, SR-<br>786, SUDHL-1/<br>Mac2a, FEPD and<br>tumorspecimen | SupM2/TS<br>(ALK knockdown) | tumor<br>specimen |
| hsa-miR-106a    | x                                       | x                                                                    | x                           | x                 |
| hsa-miR-20b     | x                                       | x                                                                    | x                           | x                 |
| hsa-miR-363     | x                                       | x*                                                                   | x                           | x                 |
| hsa-miR-17      | x*                                      | x                                                                    | x                           | x                 |
| hsa-miR-93      | x*                                      | x                                                                    | x                           | x                 |
| hsa-let-7d      | x                                       |                                                                      | x                           | x                 |
| hsa-miR-132     | x                                       |                                                                      | x                           | x                 |
| hsa-miR-505     | x                                       |                                                                      | x                           | x                 |
| hsa-miR-145     | x                                       |                                                                      | x                           | x                 |
| hsa-miR-18b     | x*                                      |                                                                      | x                           | x                 |
| hsa-miR-155     | x                                       | x                                                                    |                             | x*                |
| hsa-miR-20a     | x*                                      | x                                                                    | x                           |                   |
| hsa-miR-146a    | x                                       | x*                                                                   |                             | x*                |
| hsa-miR-101     | x*                                      | x*                                                                   | x                           |                   |
| hsa-miR-34a     | x                                       |                                                                      | x                           |                   |
| hsa-miR-146b-5p | x                                       | x*                                                                   |                             |                   |
| hsa-miR-365     | x                                       |                                                                      | x                           |                   |
| hsa-miR-181a    | x                                       |                                                                      | x                           |                   |
| hsa-miR-193b    | x                                       |                                                                      | x                           |                   |
| hsa-miR-221     | x                                       |                                                                      | x                           |                   |
| hsa-miR-223     | x                                       |                                                                      | x                           |                   |
| hsa-miR-98      | x                                       |                                                                      | x                           |                   |
| hsa-miR-135b    | x                                       |                                                                      |                             | x*                |
| hsa-miR-886-3p  |                                         | x                                                                    |                             | x*                |
| hsa-miR-708     | x*                                      |                                                                      |                             | x*                |
| hsa-miR-886-5p  |                                         | x*                                                                   |                             | x*                |
